# Supplementary material for: Modulation of the Association Between Age and Death by Risk Factor Burden in Critically Ill Patients With COVID-19
Source: PubMed Central journal article supplement — Crit Care Explor. 2022 Aug 29;4(9):e0755. doi: 10.1097/CCE.0000000000000755 (PMC9426819; doi:10.1097/cce.0000000000000755), 2022-08-29
Supplement: cc9-4-e0755-s001.pdf [file cc9-4-e0755-s001.pdf]

## Supplementary Appendix

### Modulation of the Association between Age and Death by Risk Factor Burden in Critically Ill Patients with COVID-19

**STOP**  
**COVID** Study of the Treatment and Outcomes in Critically Ill  
Patients with COVID-19

## **TABLE OF CONTENTS**

|                                                                                                  |     |
|--------------------------------------------------------------------------------------------------|-----|
| <b>Supplemental Methods</b> .....                                                                | 3   |
| <b>Supplemental Table 1:</b> Baseline characteristics of STOP-COVID patients.....                | 4-5 |
| <b>Supplemental Table 2:</b> Association of Age Categories with 28-day and 90-day Mortality..... | 6   |
| <b>Supplemental Table 3:</b> Risk Factors for 28-day Mortality.....                              | 7-8 |
| <b>Supplemental Table 4:</b> Risk factors associated with 28-day mortality.....                  | 9   |
| <b>Supplemental Table 5:</b> Association of Age Categories with 28-day by Risk Factor Group..... | 10  |
| <b>Supplemental Figure 1:</b> Non-linear association between age and 90-day mortality.....       | 11  |
| <b>Supplemental Figure 2:</b> Distribution of risk factors associated with 28-day mortality..... | 12  |
| <b>List of Participating Sites</b> .....                                                         | 13  |

## Supplemental Methods

### Multivariable Modeling of the Association of Age with 28-Day Mortality

We prespecified the variables below for inclusion in the multivariable models based on clinical knowledge, biologic plausibility, and completeness of data. All patient data were abstracted through manual chart review by study staff. To minimize missingness of laboratory and physiologic data, we selected the worst value on ICU day 1 or 2.

1. Age: 18-39 (ref); 40-49; 50-59; 60-69; 70-79;  $\geq 80$  years
2. Sex: Female (ref) vs Male
3. Race: White (ref) vs non-white
4. Hypertension: per chart review
5. Diabetes mellitus: per chart review
6. Body mass index:  $< 25$  (ref); 25-29; 30-34; 35-39.9; and  $\geq 40$  kg/m<sup>2</sup>
7. Coronary artery disease: per chart review; includes any history of angina, myocardial infarction, or coronary artery bypass graft surgery
8. Congestive heart failure: per chart review; includes patients with heart failure with preserved or reduced ejection fraction
9. Chronic obstructive pulmonary disease: per chart review
10. Current smoking status: per chart review, does not include vaping or non-tobacco products
11. Active malignancy: active malignancy (other than non-melanoma skin cancer) treated in the past year. Defined as cancer of the lung, breast, colorectal, prostate, gastric, pancreatic, melanoma, ovarian, brain, or other
12. Days from symptom onset to ICU admission:  $\leq 3$  vs.  $> 3$
13. Lymphocyte count (lowest value on ICU day 1 or day 2):  $< 1000$  vs.  $\geq 1000$  per mm<sup>3</sup> (ref)
14. Shock on ICU days 1 or 2: defined as the simultaneous receipt of  $\geq 2$  vasopressors/inotropes
15. Number of hospital ICU beds:  $\geq 100$  (ref), 50–99,  $< 50$
16. Renal, liver, and coagulation components of the Sequential Organ Failure Assessment (SOFA) score:

| SOFA Score Component                      | Categories                          |                                     |                                           |                                 |                                                       |
|-------------------------------------------|-------------------------------------|-------------------------------------|-------------------------------------------|---------------------------------|-------------------------------------------------------|
|                                           | 0                                   | 1                                   | 2                                         | 3                               | 4                                                     |
| SOFA Renal <sup>a</sup>                   | Cr $< 1.2$ mg/dL and UOP $\geq 500$ | Cr 1.2-1.9 mg/dL and UOP $\geq 500$ | Cr $\geq 2$ -3.4 mg/dL and UOP $\geq 500$ | Cr 3.5-4.9 mg/dL or UOP $< 500$ | Cr $\geq 5$ mg/dL or UOP $< 200$ or acute RRT or ESKD |
| SOFA Liver <sup>b</sup> (Bilirubin)       | $< 1.2$ mg/dL                       | 1.2-1.9 mg/dL                       | $\geq 2$ mg/dL                            | ---                             | ---                                                   |
| SOFA Coagulation <sup>b</sup> (Platelets) | $\geq 150$ $\mu$ L                  | 100-149 $\mu$ L                     | $\leq 99$ $\mu$ L                         | ---                             | ---                                                   |

<sup>a</sup>If the UOP was missing, the category was assigned according to the Cr

<sup>b</sup>Categories 3 and 4 were collapsed with category 2 due to the small number of patients with scores  $> 2$

Abbreviations: sequential organ failure score (SOFA), serum creatinine (Cr), urine output (UOP), renal replacement therapy (RRT), and end-stage kidney disease (ESKD)

**Supplemental Table 1. Baseline characteristics of STOP-COVID patients**

| Characteristic                                          | Age, years                              |                                |                                  |                                   |                                   |                                  |                              | P     |
|---------------------------------------------------------|-----------------------------------------|--------------------------------|----------------------------------|-----------------------------------|-----------------------------------|----------------------------------|------------------------------|-------|
|                                                         | All patients<br>N = 5037<br>60.9 ± 14.7 | 18-39<br>N = 474<br>32.0 ± 5.3 | 40 – 49<br>N = 592<br>45.1 ± 2.9 | 50 – 59<br>N = 1090<br>54.9 ± 2.9 | 60 – 69<br>N = 1413<br>64.5 ± 2.9 | 70 – 79<br>N = 985<br>74.0 ± 2.8 | ≥80<br>N = 483<br>84.6 ± 3.8 |       |
| Male                                                    | 3179 (63.1)                             | 310 (65.4)                     | 411 (69.4)                       | 715 (65.6)                        | 892 (63.1)                        | 573 (58.2)                       | 278 (57.6)                   | <.001 |
| <b>Race/Ethnicity</b>                                   |                                         |                                |                                  |                                   |                                   |                                  |                              |       |
| Non-Latino White                                        | 1315 (26.1)                             | 82 (17.3)                      | 89 (15.0)                        | 231 (21.2)                        | 421 (29.8)                        | 314 (31.9)                       | 178 (36.9)                   | <.001 |
| Non-Latino Black                                        | 1372 (27.2)                             | 112 (23.6)                     | 147 (24.8)                       | 317 (29.1)                        | 405 (28.7)                        | 276 (28.0)                       | 115 (23.8)                   |       |
| Non-Latino Asian                                        | 274 (5.4)                               | 28 (5.9)                       | 30 (5.1)                         | 49 (4.5)                          | 78 (5.5)                          | 53 (5.4)                         | 36 (7.5)                     |       |
| Latino                                                  | 1176 (23.4)                             | 172 (36.3)                     | 218 (36.8)                       | 292 (26.8)                        | 269 (19.0)                        | 155 (15.7)                       | 70 (14.5)                    |       |
| <b>Body mass index, kg/m<sup>2</sup></b>                | 31.9 ± 8.4                              | 35.5 ± 10.2                    | 34.8 ± 9.5                       | 33.5 ± 8.8                        | 31.8 ± 7.6                        | 29.2 ± 6.2                       | 27.2 ± 6.3                   | <.001 |
| ≤25                                                     | 886 (18.3)                              | 55 (12.3)                      | 66 (11.5)                        | 134 (12.7)                        | 214 (15.7)                        | 233 (24.6)                       | 184 (39.9)                   | <.001 |
| 25 – 29.9                                               | 1437 (29.7)                             | 86 (19.2)                      | 118 (20.6)                       | 293 (27.8)                        | 431 (31.6)                        | 345 (36.5)                       | 164 (35.6)                   |       |
| 30 – 34.9                                               | 1188 (24.5)                             | 110 (24.6)                     | 152 (26.6)                       | 271 (25.7)                        | 362 (26.5)                        | 221 (23.4)                       | 72 (15.6)                    |       |
| 35 – 39.9                                               | 624 (12.9)                              | 77 (17.2)                      | 101 (17.7)                       | 148 (14.0)                        | 185 (13.6)                        | 87 (9.2)                         | 26 (5.6)                     |       |
| ≥40                                                     | 711 (14.7)                              | 119 (26.6)                     | 135 (23.6)                       | 209 (19.8)                        | 173 (12.7)                        | 60 (6.3)                         | 15 (3.3)                     |       |
| <b>Pre-existing Comorbidities</b>                       |                                         |                                |                                  |                                   |                                   |                                  |                              |       |
| Congestive heart failure                                | 515 (10.2)                              | 16 (3.4)                       | 23 (3.9)                         | 90 (8.3)                          | 161 (11.4)                        | 138 (14.0)                       | 87 (18.0)                    | <.001 |
| Coronary artery disease                                 | 670 (13.3)                              | 4 (0.8)                        | 15 (2.5)                         | 99 (9.1)                          | 217 (15.4)                        | 220 (22.3)                       | 115 (23.8)                   | <.001 |
| Chronic obstructive pulmonary disease                   | 437 (8.7)                               | 2 (0.4)                        | 11 (1.9)                         | 56 (5.1)                          | 159 (11.3)                        | 131 (13.3)                       | 78 (16.2)                    | <.001 |
| Hypertension                                            | 3085 (61.3)                             | 103 (21.7)                     | 232 (39.2)                       | 622 (57.1)                        | 985 (69.7)                        | 767 (77.9)                       | 376 (77.9)                   | <.001 |
| Active cancer                                           | 226 (4.5)                               | 8 (1.7)                        | 15 (2.5)                         | 31 (2.8)                          | 82 (5.8)                          | 62 (6.3)                         | 28 (5.8)                     | <.001 |
| Chronic kidney disease                                  | 657 (13.0)                              | 19 (4.0)                       | 40 (6.8)                         | 99 (9.1)                          | 186 (13.2)                        | 196 (19.9)                       | 117 (24.2)                   | <.001 |
| End-stage kidney disease                                | 190 (3.8)                               | 13 (2.7)                       | 15 (2.5)                         | 35 (3.2)                          | 68 (4.8)                          | 43 (4.4)                         | 16 (3.3)                     | 0.07  |
| <b>Acute physiologic factors in the ICU<sup>a</sup></b> |                                         |                                |                                  |                                   |                                   |                                  |                              |       |
| ≤3 days from symptom onset to ICU admission             | 1083 (21.6)                             | 84 (17.8)                      | 84 (14.3)                        | 201 (18.5)                        | 311 (22.1)                        | 230 (23.6)                       | 173 (36.0)                   | <.001 |
| SOFA Renal score                                        |                                         |                                |                                  |                                   |                                   |                                  |                              |       |
| 0                                                       | 2393 (48.3)                             | 311 (66.5)                     | 363 (62.1)                       | 559 (51.8)                        | 606 (43.8)                        | 385 (39.8)                       | 169 (35.8)                   | <.001 |
| 1                                                       | 1254 (25.3)                             | 82 (17.5)                      | 108 (18.5)                       | 258 (23.9)                        | 379 (27.4)                        | 278 (28.7)                       | 149 (31.6)                   |       |
| 2                                                       | 646 (13.0)                              | 29 (6.2)                       | 46 (7.9)                         | 126 (11.7)                        | 192 (13.9)                        | 163 (16.8)                       | 90 (19.1)                    |       |
| 3                                                       | 291 (5.9)                               | 17 (3.6)                       | 29 (5.0)                         | 49 (4.5)                          | 83 (6.0)                          | 76 (7.9)                         | 37 (7.8)                     |       |
| 4                                                       | 371 (7.5)                               | 29 (6.2)                       | 39 (6.7)                         | 87 (8.1)                          | 123 (8.9)                         | 66 (6.8)                         | 27 (5.7)                     |       |
| SOFA Liver score                                        |                                         |                                |                                  |                                   |                                   |                                  |                              |       |
| 0                                                       | 3942 (85.5)                             | 380 (86.0)                     | 470 (85.3)                       | 852 (84.8)                        | 1078 (84.2)                       | 776 (85.9)                       | 386 (89.6)                   | 0.15  |
| 1                                                       | 459 (10.0)                              | 39 (8.8)                       | 62 (11.3)                        | 97 (9.7)                          | 142 (11.1)                        | 85 (9.4)                         | 34 (7.9)                     |       |
| 2 – 4                                                   | 212 (4.6)                               | 23 (5.2)                       | 19 (3.5)                         | 56 (5.6)                          | 61 (4.8)                          | 42 (4.7)                         | 11 (2.6)                     |       |
| SOFA Coagulation score                                  |                                         |                                |                                  |                                   |                                   |                                  |                              |       |
| 0                                                       | 3796 (76.9)                             | 386 (83.2)                     | 492 (84.1)                       | 845 (84.1)                        | 1038 (75.3)                       | 713 (74.1)                       | 322 (68.4)                   | <.001 |
| 1                                                       | 828 (16.8)                              | 61 (13.2)                      | 73 (12.5)                        | 161 (15.0)                        | 243 (17.6)                        | 184 (19.1)                       | 106 (22.5)                   |       |
| 2 – 4                                                   | 311 (6.3)                               | 17 (3.7)                       | 20 (3.4)                         | 68 (6.3)                          | 98 (7.1)                          | 65 (6.8)                         | 43 (9.1)                     |       |
| Invasive mechanical ventilation                         | 3006 (59.7)                             | 263 (55.5)                     | 346 (58.5)                       | 655 (60.1)                        | 889 (62.9)                        | 581 (59.0)                       | 272 (56.3)                   | 0.03  |
| FiO <sub>2</sub> , (MV only)                            | 0.79 ± 0.22                             | 0.81 ± 0.23                    | 0.82 ± 0.21                      | 0.80 ± 0.22                       | 0.79 ± 0.23                       | 0.79 ± 0.22                      | 0.76 ± 0.25                  | 0.07  |

|                                                 | Age, years                              |                                |                                  |                                   |                                   |                                  |                              | P      |
|-------------------------------------------------|-----------------------------------------|--------------------------------|----------------------------------|-----------------------------------|-----------------------------------|----------------------------------|------------------------------|--------|
|                                                 | All patients<br>N = 5037<br>60.9 ± 14.7 | 18-39<br>N = 474<br>32.0 ± 5.3 | 40 – 49<br>N = 592<br>45.1 ± 2.9 | 50 – 59<br>N = 1090<br>54.9 ± 2.9 | 60 – 69<br>N = 1413<br>64.5 ± 2.9 | 70 – 79<br>N = 985<br>74.0 ± 2.8 | ≥80<br>N = 483<br>84.6 ± 3.8 |        |
| PEEP, cm H2O (MV only)                          | 13.4 ± 4.2                              | 15.1 ± 5.0                     | 15.1 ± 4.6                       | 14.0 ± 4.1                        | 13.1 ± 3.7                        | 12.5 ± 3.9                       | 11.2 ± 3.9                   | <.001  |
| PaO2 to FiO2 ratio (MV only)                    | 120.8 ± 75.9                            | 117.6 ± 81.6                   | 108.2 ± 65.9                     | 119.3 ± 79.0                      | 119.7 ± 67.1                      | 124.4 ± 70.7                     | 140.1 ± 104.0                | <.001  |
| Shock                                           | 807 (16.0)                              | 51 (10.8)                      | 75 (12.7)                        | 167 (15.3)                        | 240 (17.0)                        | 183 (18.6)                       | 91 (18.8)                    | <0.001 |
| <b>Treatments for COVID-19 (ICU day 1 or 2)</b> |                                         |                                |                                  |                                   |                                   |                                  |                              |        |
| Remdesivir                                      | 347 (6.9)                               | 50 (10.6)                      | 57 (9.6)                         | 79 (7.3)                          | 85 (6.0)                          | 58 (5.9)                         | 18 (3.7)                     | <.001  |
| Corticosteroids                                 | 1293 (25.7)                             | 94 (19.8)                      | 127 (21.5)                       | 283 (26.0)                        | 386 (27.3)                        | 284 (28.8)                       | 119 (24.6)                   | <.001  |
| Tocilizumab                                     | 660 (13.1)                              | 84 (17.7)                      | 93 (15.7)                        | 174 (16.0)                        | 193 (13.7)                        | 86 (8.7)                         | 30 (6.2)                     | <.001  |
| <b>Number of ICU beds (pre-COVID-19)</b>        |                                         |                                |                                  |                                   |                                   |                                  |                              | <0.001 |
| Small (<50 beds)                                | 1647 (32.7)                             | 118 (24.9)                     | 163 (27.5)                       | 356 (32.7)                        | 500 (35.4)                        | 365 (37.1)                       | 145 (30.0)                   |        |
| Medium (50-99 beds)                             | 1390 (27.6)                             | 138 (29.1)                     | 169 (28.6)                       | 302 (27.7)                        | 376 (26.6)                        | 241 (24.5)                       | 164 (34.0)                   |        |
| Large (≥100 beds)                               | 2000 (39.7)                             | 218 (46.0)                     | 260 (43.9)                       | 432 (39.6)                        | 537 (38.0)                        | 379 (38.5)                       | 174 (36.0)                   |        |

Data are presented as count (percentage), mean ± standard deviation, or median (interquartile range)

<sup>a</sup>Represents worst value from ICU day 1 or day 2

Table Legend: abbreviations: cm H2O, centimeters of water; FiO2, fraction of inspired oxygen; ICU, intensive care unit; IQR, interquartile range; kg, kilograms; m<sup>2</sup>, meters squared; mm Hg, millimeters of mercury; MV, mechanical ventilation; PaO2, arterial partial pressure of oxygen; PEEP, positive end-expiratory pressure; SOFA, sequential organ failure assessment score

Missing data: N = 191 (3.8%) participants for body mass index, N = 27 (0.5%) participants for symptom onset ≤3 days to ICU day 1, N = 82 for SOFA Renal Score (1.6%), N = 424 (8.4%) for SOFA Liver Score, N = 102 (2.0%) for SOFA Coagulation Score, N = 118 (3.9%) for FiO2, N = 159 (5.3%) for PEEP, N = 204 (6.8%) for PaO2:FiO2 ratio, N = 546 (10.8%) for lymphocyte count

**Supplemental Table 2. Association of Age Categories with 28-day and 90-day Mortality**

| Age groups    | 28-day Mortality |            |                       |                       |                       |                       |
|---------------|------------------|------------|-----------------------|-----------------------|-----------------------|-----------------------|
|               | N                | No. Events | Model 1 OR (95% CI)   | Model 2 OR (95% CI)   | Model 3 OR (95% CI)   | Model 4 OR (95% CI)   |
| < 65 years    | 2856             | 734        | Reference             | Reference             | Reference             | Reference             |
| 65 – 79 years | 1698             | 751        | 2.29<br>(2.02 – 2.60) | 2.10<br>(1.83 – 2.42) | 2.08<br>(1.79 – 2.42) | 2.06<br>(1.77 – 2.40) |
| ≥ 80 years    | 483              | 301        | 4.78<br>(3.91 – 5.85) | 4.70<br>(3.77 – 5.85) | 5.09<br>(4.00 – 6.49) | 5.09<br>(3.99 – 6.50) |
| Age groups    | 90-day Mortality |            |                       |                       |                       |                       |
|               | N                | No. Events | Model 1 OR (95% CI)   | Model 2 OR (95% CI)   | Model 3 OR (95% CI)   | Model 4 OR (95% CI)   |
| < 65 years    | 2856             | 853        | Reference             | Reference             | Reference             | Reference             |
| 65 – 79 years | 1698             | 846        | 2.33<br>(2.06 – 2.64) | 2.12<br>(1.85 – 2.43) | 2.11<br>(1.82 – 2.45) | 2.10<br>(1.81 – 2.44) |
| ≥ 80 years    | 483              | 318        | 4.53<br>(3.69 – 5.55) | 4.37<br>(3.50 – 5.46) | 4.78<br>(3.75 – 6.10) | 4.86<br>(3.80 – 6.22) |

Model 1 is unadjusted.

Model 2 is adjusted for sex, race, current smoking status, body mass index, hypertension, diabetes mellitus, chronic obstructive pulmonary disease, coronary artery disease, congestive heart failure, and active malignancy.

Model 3 is adjusted for all Model 2 covariates along with symptom duration ≤3 days prior to ICU admission, number of ICU beds, shock, lymphocyte count <1000/uL, degree of hypoxemia and respiratory support, SOFA renal, SOFA liver, and SOFA coagulation scores.

Model 4 is adjusted for all Model 3 covariates along with remdesivir, tocilizumab, and corticosteroids

**Supplemental Table 3. Risk Factors for 28-day Mortality**

| Factor                                             | 28 Day Mortality          |                           |
|----------------------------------------------------|---------------------------|---------------------------|
|                                                    | Unadjusted OR (95% CI)*   | Adjusted** OR (95% CI)    |
| <b>Male vs Female</b>                              | <b>1.22 (1.08 – 1.38)</b> | <b>1.29 (1.21 – 1.38)</b> |
| <b>Non-white vs White</b>                          | 1.03 (0.91 – 1.16)        | <b>1.08 (1.02 – 1.15)</b> |
| <b>Body mass index, kg/m<sup>2</sup></b>           |                           |                           |
| <25                                                | [reference]               | [reference]               |
| 25 – 30                                            | 0.96 (0.81 – 1.14)        | 1.08 (0.99 – 1.18)        |
| 30 – 35                                            | 0.78 (0.66 – 0.94)        | 1.02 (0.93 – 1.12)        |
| 35 – 40                                            | 0.79 (0.64 – 0.97)        | 1.15 (1.03 – 1.29)        |
| ≥40                                                | 0.85 (0.69 – 1.04)        | 1.43 (1.28 – 1.60)        |
| <b>Hypertension</b>                                | <b>1.88 (1.66 – 2.13)</b> | 1.03 (0.96 – 1.11)        |
| <b>Diabetes mellitus</b>                           | <b>1.46 (1.30 – 1.64)</b> | <b>1.19 (1.12 – 1.27)</b> |
| <b>Coronary artery disease</b>                     | <b>1.87 (1.59 – 2.21)</b> | <b>1.17 (1.07 – 1.28)</b> |
| <b>Congestive heart failure</b>                    | <b>1.52 (1.27 – 1.83)</b> | 0.95 (0.86 – 1.05)        |
| <b>Chronic obstructive pulmonary disease</b>       | <b>1.69 (1.38 – 2.06)</b> | <b>1.27 (1.14 – 1.41)</b> |
| <b>Current smoker</b>                              | 1.06 (0.82 – 1.37)        | <b>1.15 (1.01 – 1.31)</b> |
| <b>Active cancer</b>                               | <b>2.39 (1.83 – 3.13)</b> | <b>2.18 (1.90 – 2.51)</b> |
| <b>Symptom onset ≤3 Days to ICU admission</b>      | <b>1.59 (1.39 – 1.82)</b> | <b>1.31 (1.22 – 1.41)</b> |
| <b>Lymphocyte count &lt; 1000/uL</b>               | <b>1.45 (1.26 – 1.67)</b> | <b>1.14 (1.06 – 1.22)</b> |
| <b>Degree of hypoxemia and respiratory support</b> |                           |                           |
| No IMV                                             | [reference]               | [reference]               |
| ≥300                                               | <b>2.63 (1.70 – 4.07)</b> | <b>1.91 (1.53 – 2.39)</b> |
| 200 – 299                                          | <b>1.58 (1.21 – 2.07)</b> | <b>1.15 (1.00 – 1.31)</b> |
| 100 – 199                                          | <b>1.80 (1.54 – 2.09)</b> | <b>1.66 (1.54 – 1.80)</b> |
| <100                                               | <b>2.48 (2.15 – 2.86)</b> | <b>2.44 (2.27 – 2.63)</b> |
| <b>Shock</b>                                       | <b>1.42 (1.26 – 1.61)</b> | <b>1.19 (1.11 – 1.27)</b> |
| <b>SOFA coagulation score</b>                      |                           |                           |
| 0                                                  | [reference]               | [reference]               |
| 1                                                  | <b>1.50 (1.29 – 1.75)</b> | <b>1.29 (1.20 – 1.40)</b> |
| ≥2                                                 | <b>2.25 (1.80 – 2.81)</b> | <b>1.76 (1.57 – 1.98)</b> |
| <b>SOFA liver score</b>                            |                           |                           |
| 0                                                  | [reference]               | [reference]               |
| 1                                                  | <b>1.40 (1.16 – 1.69)</b> | <b>1.28 (1.16 – 1.41)</b> |
| ≥2                                                 | <b>1.38 (1.11 – 1.70)</b> | <b>1.24 (1.11 – 1.39)</b> |
| <b>SOFA renal score</b>                            |                           |                           |
| 0                                                  | [reference]               | [reference]               |
| 1                                                  | <b>1.89 (1.63 – 2.19)</b> | <b>1.35 (1.26 – 1.46)</b> |
| 2                                                  | <b>3.73 (3.12 – 4.47)</b> | <b>2.19 (1.99 – 2.40)</b> |
| 3                                                  | <b>4.16 (3.25 – 5.33)</b> | <b>2.54 (2.24 – 2.89)</b> |
| 4                                                  | <b>3.27 (2.63 – 4.05)</b> | <b>2.41 (2.15 – 2.70)</b> |
| <b>Number of ICU beds</b>                          |                           |                           |
| ≥100                                               | [reference]               | [reference]               |
| 50 – 99                                            | <b>1.67 (1.44 – 1.95)</b> | <b>1.67 (1.55 – 1.80)</b> |
| <50                                                | <b>3.47 (3.02 – 4.00)</b> | <b>3.48 (3.24 – 3.74)</b> |

\*Univariate analyses, each variable is in its own model with 28-day mortality as the outcome

\*\*Fully adjusted analyses, adjusted for age modeled as a spline, all other covariates listed in the table, and treatments for COVID-19: remdesivir, tocilizumab, and corticosteroids.

OR 95% CI in **bold** demonstrate statistical significance

Abbreviations: CI, confidence interval; FiO<sub>2</sub>, fraction of inspired oxygen; ICU, intensive care unit; IQR, interquartile range; kg, kilograms; m<sup>2</sup>, meters squared; mm Hg, millimeters of mercury; IMV, invasive mechanical ventilation; OR, odds ratio; PaO<sub>2</sub>, arterial partial pressure of oxygen; SOFA, sequential organ failure assessment score



**Supplemental Table 4. Risk factors associated with 28-day mortality**

| <b>STOP-COVID variables significantly associated with 28-day mortality used to create risk factor score categories</b> |
|------------------------------------------------------------------------------------------------------------------------|
| Male Sex                                                                                                               |
| Hypertension                                                                                                           |
| Diabetes mellitus                                                                                                      |
| Coronary artery disease                                                                                                |
| Congestive heart failure                                                                                               |
| Chronic obstructive pulmonary disease                                                                                  |
| Active Cancer                                                                                                          |
| $\leq 3$ Days from Symptom Onset to ICU Admission                                                                      |
| Lymphocyte Count $< 1000/\mu\text{L}$                                                                                  |
| Invasive Mechanical Ventilation                                                                                        |
| Shock                                                                                                                  |
| SOFA Coagulation Score $> 0$                                                                                           |
| SOFA Liver Score $> 0$                                                                                                 |
| SOFA Renal Score $> 0$                                                                                                 |
| No. ICU Beds $< 100$                                                                                                   |

**Supplemental Table 5. Association of Age Categories with 28-day by Risk Factor Group**

| <b>Age groups</b>    | <b>Risk Factor Group</b> |                       |                       |
|----------------------|--------------------------|-----------------------|-----------------------|
|                      | <b>0 – 4</b>             | <b>5 – 6</b>          | <b>7 – 13</b>         |
| <b>&lt; 65 years</b> | Reference                | Reference             | Reference             |
| <b>65 – 79 years</b> | 3.01<br>(2.27 – 3.98)    | 1.58<br>(1.27 – 1.95) | 1.66<br>(1.31 – 2.10) |
| <b>≥ 80 years</b>    | 6.58<br>(4.18 – 10.37)   | 3.59<br>(2.54 – 5.07) | 3.40<br>(2.34 – 4.94) |

Adjusted for variables not included in the risk factor scores, including race (white vs non-white), body mass index, smoking status, and COVID-19 treatments: remdesivir, tocilizumab, corticosteroid use.

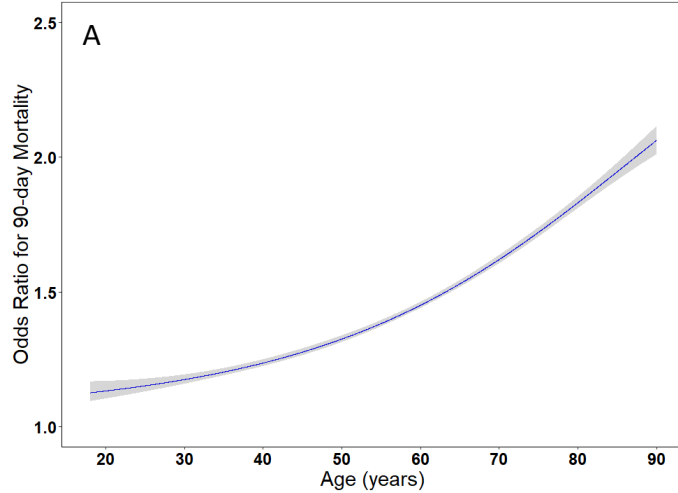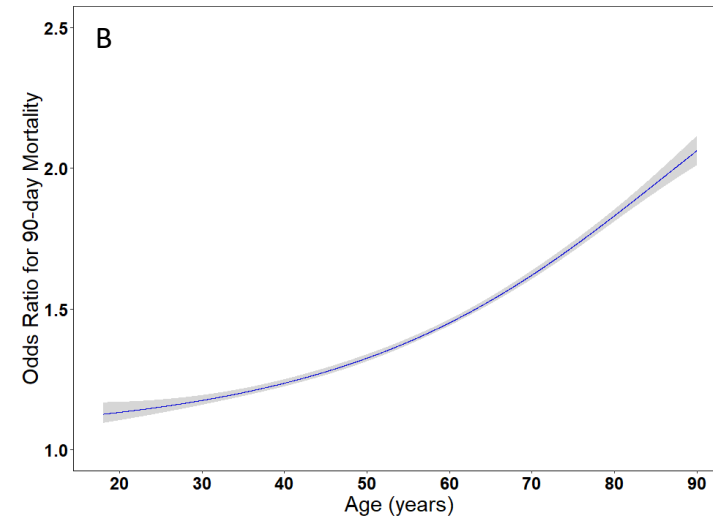

**Supplemental Figure 1. Non-linear association between age and 90-day mortality**

- A) The model is unadjusted. Age-linear AIC: 31783 vs. Age-spline AIC: 31773, likelihood ratio test P-value for AIC difference: <0.001.
- B) This model is fully adjusted for demographic characteristics (male sex, hypertension, diabetes mellitus, coronary artery disease, congestive heart failure, chronic obstructive pulmonary disease, and active cancer), acute physiology factors in the ICU (symptom onset  $\leq 3$  days prior to ICU admission, lymphocyte count  $<1000/uL$ , invasive mechanical ventilation, shock, SOFA coagulation  $> 0$ , SOFA liver  $> 0$ , and SOFA renal  $> 0$ ), and ICU organizational factors (admission to a hospital with  $< 100$  ICU beds) and COVID-19 treatments including remdesivir, tocilizumab, and corticosteroids). Age-linear AIC: 27543 vs. Age-spline AIC: 27444, likelihood ratio test P-value for AIC difference:  $< 0.01$ .

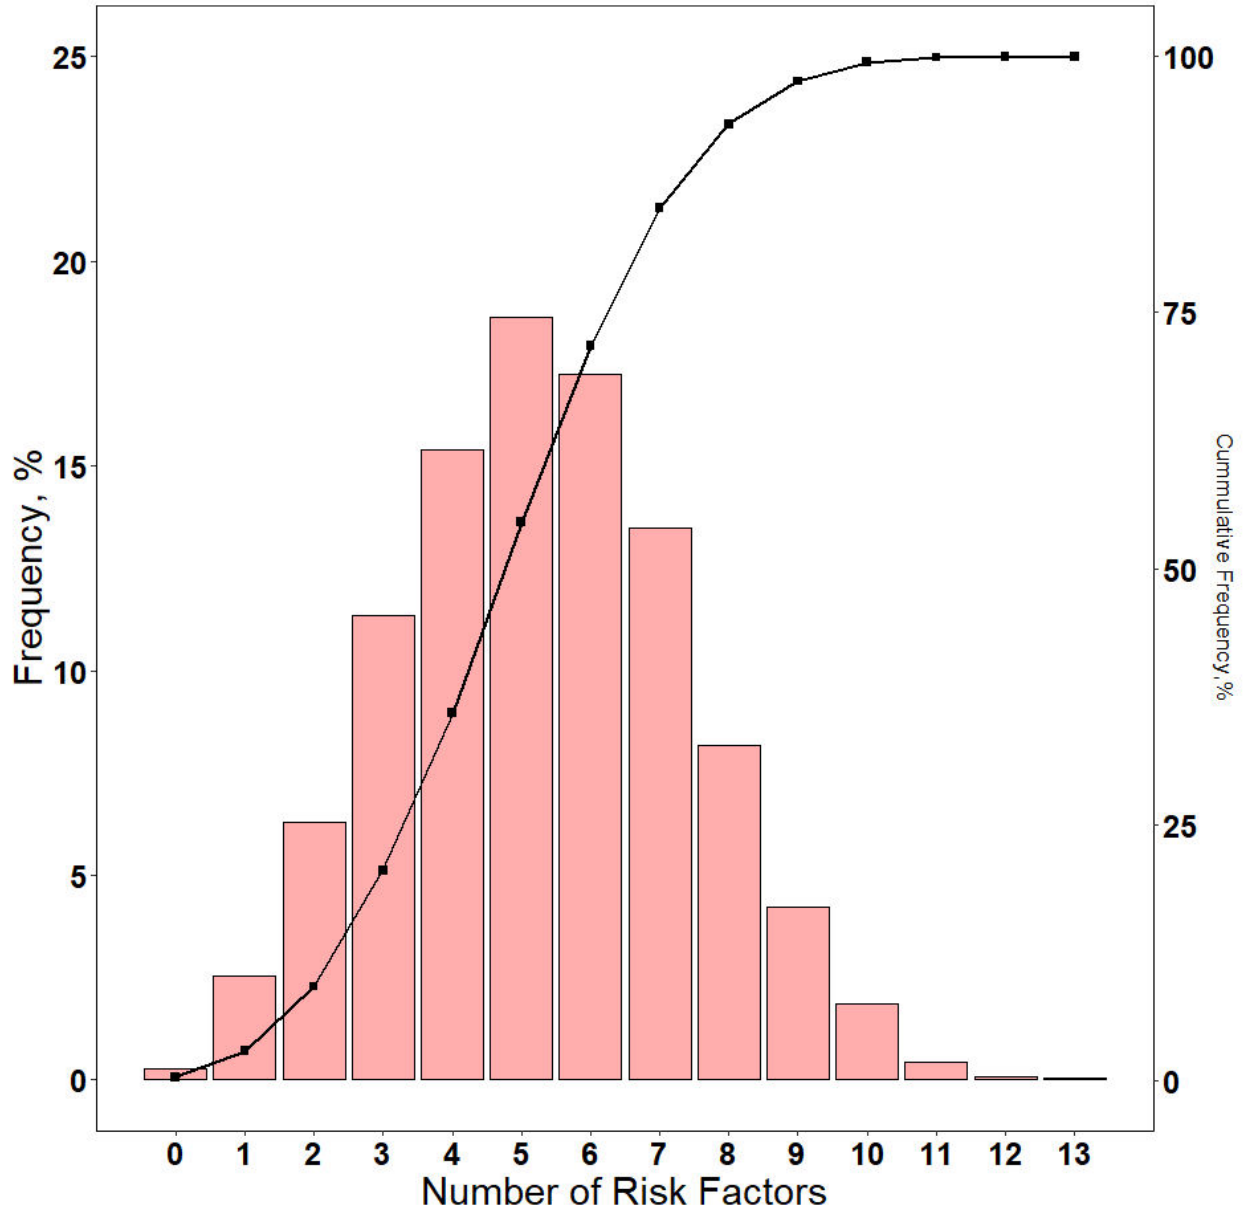

**Supplemental Figure 2. Distribution of risk factors associated with 28-day mortality**  
 Figure shows the frequency and cumulative frequency of risk factors present in STOP-COVID participants.

## List of Participating Sites

|                                                                 |
|-----------------------------------------------------------------|
| <b>Northeast</b>                                                |
| Beth Israel Deaconess Medical Center                            |
| Brigham and Women's Faulkner Hospital                           |
| Brigham and Women's Hospital                                    |
| Cooper University Health Care                                   |
| Hackensack Meridian Health Hackensack University Medical Center |
| Hackensack Mountainside Hospital                                |
| Johns Hopkins Hospital                                          |
| Kings County Hospital Center                                    |
| Lowell General Hospital                                         |
| Massachusetts General Hospital                                  |
| MedStar Georgetown University Hospital                          |
| Montefiore Medical Center                                       |
| Mount Sinai                                                     |
| Newton Wellesley Hospital                                       |
| New York-Presbyterian Queens Hospital                           |
| New York-Presbyterian/Weill Cornell Medical Center              |
| New York University Langone Hospital                            |
| Rutgers/New Jersey Medical School                               |
| Rutgers/Robert Wood Johnson Medical School                      |
| Temple University Hospital                                      |
| Thomas Jefferson University Hospital                            |
| Tufts Medical Center                                            |
| United Health Services Hospitals                                |
| University of Pennsylvania Health System                        |
| University of Pittsburgh Medical Center                         |
| Westchester Medical Center                                      |
| Yale University Medical Center                                  |
| <b>South</b>                                                    |
| Baylor College of Medicine, Houston                             |
| Baylor University Medical Center/Baylor Scott White and Health  |
| Duke University Medical Center                                  |
| Mayo Clinic, Florida                                            |
| Memphis VA Medical Center                                       |
| Methodist University Hospital                                   |
| Ochsner Medical Center                                          |
| Tulane Medical Center                                           |
| University of Alabama-Birmingham Hospital                       |
| University of Florida Health-Gainesville                        |
| University of Florida Health-Jacksonville                       |
| University of Miami Health System                               |
| University of North Carolina Hospitals                          |
| University of Texas Southwestern Medical Center                 |
| University of Virginia Health System                            |
| <b>Midwest</b>                                                  |
| Barnes-Jewish Hospital                                          |
| Cook County Health                                              |
| Mayo Clinic, Rochester                                          |
| Froedtert Hospital                                              |
| Indiana University Health Methodist Hospital                    |
| Northwestern Memorial Hospital                                  |
| Promedica Health System                                         |
| Rush University Medical Center                                  |
| University Hospitals Cleveland Medical Center                   |
| University of Chicago Medical Center                            |
| University of Illinois Hospital and Health Sciences System      |
| University of Kentucky Hospital                                 |
| University of Michigan Hospital                                 |
| University of Oklahoma Health Sciences Center                   |
| <b>West</b>                                                     |
| Loma Linda University Medical Center                            |
| Mayo Clinic, Arizona                                            |
| Oregon Health and Science University Hospital                   |
| Renown Health                                                   |
| Stanford Healthcare                                             |
| University of California-Davis Medical Center                   |
| University of California-Los Angeles Medical Center             |
| University of California-San Diego Medical Center               |
| University of California-San Francisco Medical Center           |
| UCHealth University of Colorado                                 |
| University Medical Center of Southern Nevada                    |
| University of Washington Medical Center                         |
